# Supplementary material for: Precise control of miR-125b levels is required to create a regeneration-permissive environment after spinal cord injury: a cross-species comparison between salamander and rat
Source: PubMed Central journal article supplement (PMC4036468; doi:10.1242/dmm.014837), 2014-04-03
Supplement: supp_7.6.601_DMM014837.pdf [file supp_7.6.601_DMM014837.pdf]

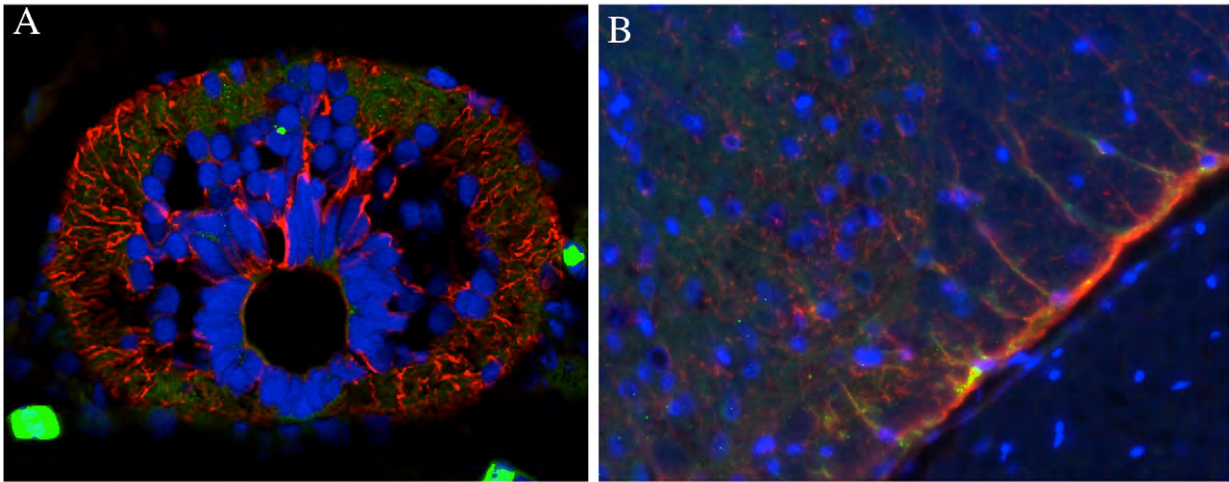

C **Rat**      GCUUAAGA UU **CUCAGGGA** UAGACGUGAU  
**Axotl**    GCAUAAUUUU **CUCAGGGA** UACACUUUUU

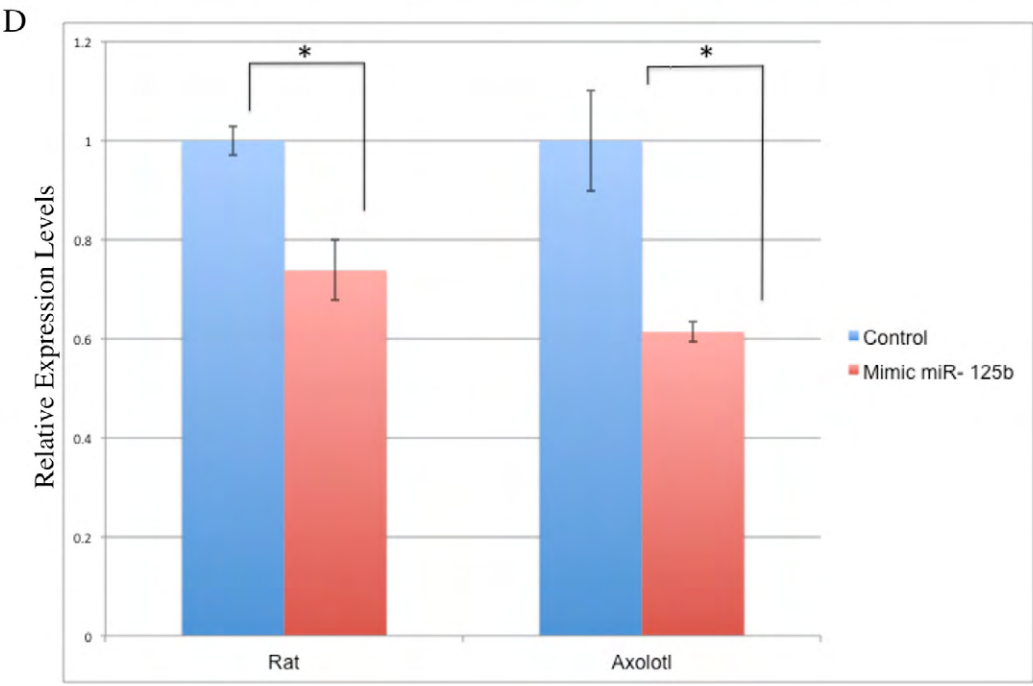

**Fig. S1.** (A) No Sema4D protein is detected by immunofluorescence in the uninjured axolotl spinal cord. (B) In uninjured rat spinal cord, Sema4D protein is detected in *GFAP*-positive cells. (C) The seed sequence for miR-125b is highly conserved among species, and is identical in rat and axolotl. (D) Luciferase assay shows functional targeting of miR-125b to the 3'UTR of rat and axolotl *Sema4D* ( $P < 0.05$ ).

GAAAGAGTGCACAGGGCTGAGAGGGCCTGTCTGACCCGCCTGGGAGAGAGCCTACAGC  
CCCGGCCGCCATTCCACGGGCTCCGGCCGCGGGCACCTGTTACTGGAGGCACCGGGCT  
GTGTGTGGCGGGGAGCTGCCACCGCAGGGTCTGTCTGTTACTCAAACGGGACCTTC  
ACTCTGCAAAAAGAGCGTGCAGAAGTTCAGAAGAGCCCTACACGTGAAGAGAACCTGC  
GTTACTTCTGAGATTAACCTTTAAGCTTTCAGGTTTCATCGCTCAGCTCAACGATGGAGAG  
GAGTTTTTGTGGAGACTGACGAGCAGAAGTTTCCGGCTGTCACAGTCGAAATCGTGTG  
GTTCTTGTGCGGAGCAGTACTAGGGCCGAAATGACTACACCCCCACACTGTAGGCT  
GAGGCTGATGGTTAGCAGCTTCCCCCTGAGCGCTTCTTGTCTCTCTTGACACCAGCGGA  
CATGCCTGCCGCTAAAACGCGCTCTGCCTTACTGCCCC**ATGAGCAGCTGTTGCCGCACT**  
**CACTCCAGAGGGTGCGCAATGGCTCCGGCTGTGCTGTGTGCAGTCTTGGGGTTGGTACTTG**  
**GGATAGCAGCCGCTTTGGCCCCGTGCCCAGGACTACGTGGGAACAGCAAGAAATTCATC**  
**TGAAACATTTTCAGGAGTCCACAGTCTTCAACTACTCAACGTTATTGCTCAGCGAAGAAAC**  
**CAATATTTTATACATAGGCGCACGAGAAGCCATCTTTGCTGTAAATTCTTTAGATGTGTCC**  
**GAAAAGCAGAATAAGGTGAAGTGGGCTGTTAGCGAAGACACCAAAAAGAATGTTCCAG**  
**AAAAGGAAAAGTCCATACAGACCGACTGCCTTAATTATGTCCGTGTCTTACAACCACTAAA**  
**TAGCAGTGTCTGTACGTGTGTGGAACAAACGTTTTCAACCTACCTGTAACCTATTTGAGC**  
**GTTTCTCTTTTCAAATGGTGGGTAAGAGTGAAGATGGTAAAGGACGCTGTCCCTTTGATC**  
**CAGCGCATAGTTACACCTCAGTCATGGTCGATGGCGAACTCTATTCTGGAACATCTTATAC**  
**CTTTTTGGGAAGTGAGCCGATCATTCTGAGACATTACAGCATGGTCAACTAAGAACAGA**  
**ATATGCGGTACCTGGCTGAACGAACCCAGATTTGTTTTTCTGATGTGATCCGAGAATCT**  
**CCGAGTCCGGGCGGTGATGATAAAGTACTTTTTTCTTCACTGAAGTGTGCGTGGAAAT**  
**ATGAATTTGTTAATAAGCTGTTGATCCCCAGGATCGCCAGAGTTTGAAGTGCATAACTAG**  
**CCAAGCCAAGGCATTGAACTACAATACCTCCCTGGATTTACCAGACAAAACCTTTCAGTTT**  
**GTGAAAGACCACCCTCTGATGAATGACTTGGTGTGATGCCAATAGGAAACCGACCCAAATTG**  
**ATGAAGCAGAATGTGAAATACACTCAAATTGTGGTTGATAGGGTGAAGCCCTTGATCAT**  
**AATGTGTATGATGTCATGTTTATCAGCACAGATAAAGGAACACTTCAAAAAGCGCTCAGT**  
**TATGCAAATGAAATGTACATCATTGAGGAAATTGAGCTTTTTCCCGAATTCCGAGCCGATCC**  
**AGACACTGATCCTGTATCCGAAAAGGATAAGAAATTCATTTATGCAGGCTCCAATGTTG**  
**GGGTGGTGCAGTCACCTGTTGCGTCTGTGAGAAGTACGGCTCCTGTGTGGACTGTGTGCT**  
**CTCTAGGGATCCCTACTGTGCTTGGCAGCAAGATAAAGACTCCTGTGTTACATTTCCCAA**  
**TCAGGCAGTATTGACAGTTCCTTGATACAGAAATTAATGGGAATGCCTCCACTTGCTTGA**  
**ATAAAAGCAAAGAGAGAGAGCTGCTTCACATCCTGAATCTCGGAAGCTCTGTAAACTGA**  
**CATGCTCTCAAAAGTCAAATCTAGCAACCGTTTTCTGGATGTTTGAAGAGACCGAGTAA**  
**CAGCTGAGGGGCCTAAGTATTATCGTCTGGGAGAAGCATTGTTTCGTCTTCAATGTAACCGT**  
**GGAGGACATGGGAGTTTATCAGTGCTTGTCTGAAGAAGATGTGTTGAATATAAAGTACTA**  
**TCAAGTACTTGCTCAACATGTTTTGGAATTGAGAAAAGTTCCACCAACGACGACGACAGT**  
**GGGTCCCACCCACGTTGCTACACAGACAGAAGGTAATAATGATAGATCAAAAATGTCAAC**  
**TATGGGAACTGAAGGGTCTTCCACTCAGACATCAGCTTCCCCGACAGTACCGCTAACCAC**  
**CACCTCCACCACCACAGTCATAACAAATCCAACCTCCCATGAATTAACAAGCAAGGC**  
**CTCCATAACGGAGATCTTCAGTGCAGCTCCTGAAATTCGTTTGGAAAAGACTTTGTACTTG**  
**ACAAAGACAAACGACAACCCCTTTTCATGTATCTGTTTGTGTTTTTTTTTGTACTGTTTGC**  
**GTGCCTGCTTACCTACAATTGTTACAAAGGGTTTCTGCCAGAAAATTGTCTTAAGTATCGC**  
**TCGGCCATGTTGCCTGGAAGGAARAAGCTGTGGCTGATTTTGTGGATTGCGAGCCGGGC**  
**TAAAGGAGACTTTGGTGGAGCAGAAGATTGCCAGAGCCAAAATGGTGAGCAGCCAAA**  
**GACATCTCGTGACACTGGCTACGAGACTGAGACAGAATGCGGGAATGGCAATATCCACA**  
**TAAGCATGAGACAGAGACGATAGAGGAGGATGACAGTGAAGCAAGCTTCTTGTGTAACCT**  
**GTGATCTAAAATTTGCAGATTCAGATGCAGAGGGTGAAGCAACATCTGTCATTCCC**  
**CTTTGGGTATATTCAACTTTTGARKYRMATWCCYKYSRSCRMYYWSKSKKYCKGRRSCAY**  
**RSRWMSWTGGACTGCATTGTGCCTAACTACAACATCCTTGAACCTATCTTTAACTCGCCTT**  
**ACGTAAAGAAAAAAGTTACTTTGCAATCCCCTCAATTCAGAGTCTTAAAATAATCTTTTT**  
**TTAATGCATTTTTTTTTGTCCGTGATTTTTGTGACCAATTTATGTTCTTACGTGACCCAAAT**  
**TGGTCCCTTTAGTTCCCTYAGTATTTTCATGCTTTATTGAATGCGGYACATTCTGTCAGCACTC**  
**TTTACATCAGTCAAAAAGAGAAGTCGAACTTGCCTTTAATTCCAAATTGGAAATTAATTTT**  
**AGTTTATCAGATTGGTAAGTGATTAGTCTATTGTCCAAATTAGGACAGCTTTGCCTTTAGT**  
**GTTCTCTACTGAATGTGATTGTTTCTCTTTGAGGTTTTACTTTCTTCTGATATGATTTTTACA**  
**CTGGTGCAAATGTAGCTAAATTTGCATAATTT**CTCAGGGA**TACACTTTTTCTTTTCGTT**  
**AGAAACTGGCCACTTTTTTGTATGCAAGAGGGATGTGTGTGTGGGCTCGAAAGAGGGGAG**  
**CACAACTAAAAA**

**Fig. S2. Full-length axolotl sema4D.** The coding sequence is marked in red, the start site ATG is highlighted in bold. The seed sequences of miR-125b is highlighted in green.

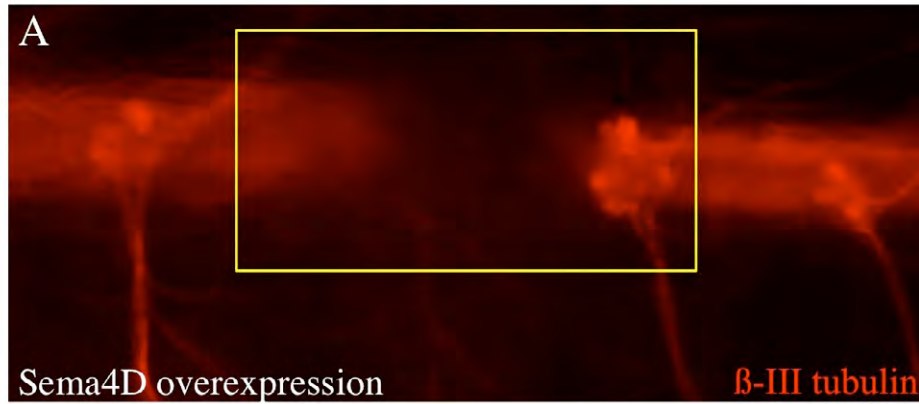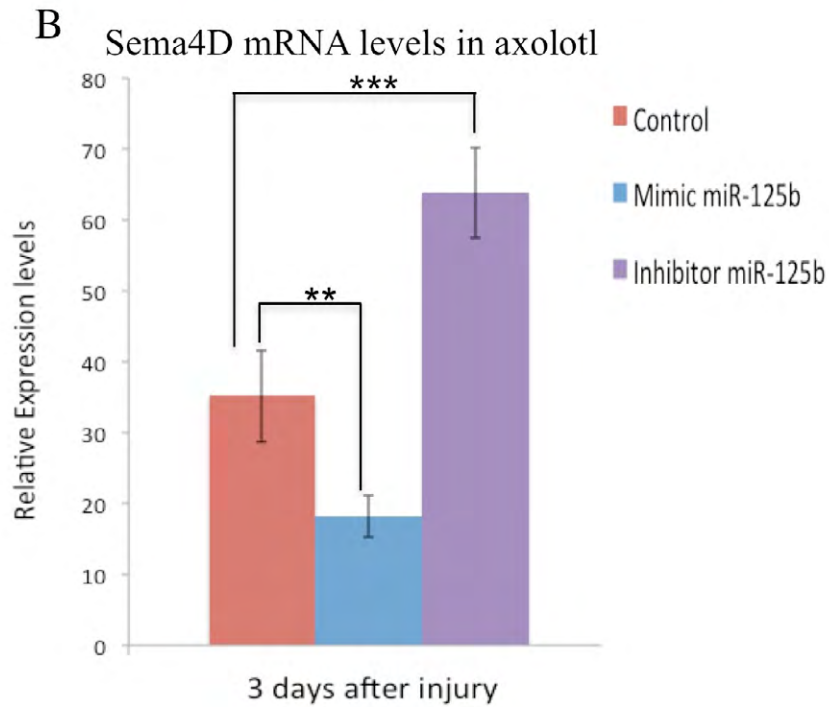

**Fig. S3.** (A) Wholemout anti-β-III staining on axons 7 days post injury in animals injected with a plasmid driving expression of *Sema4D* in cells at the injury site in axolotl after injury suffices to inhibit axonal regeneration. (B) Quantitative RT-PCR of *Sema4D* levels in axolotl after treatment with miR-125b mimic or inhibitor. In mimic-treated animals, *Sema4D* levels decrease ( $P<0.01$ ); in miR-125b inhibitor-treated animals, the levels of *Sema4D* increase ( $P<0.001$ ).

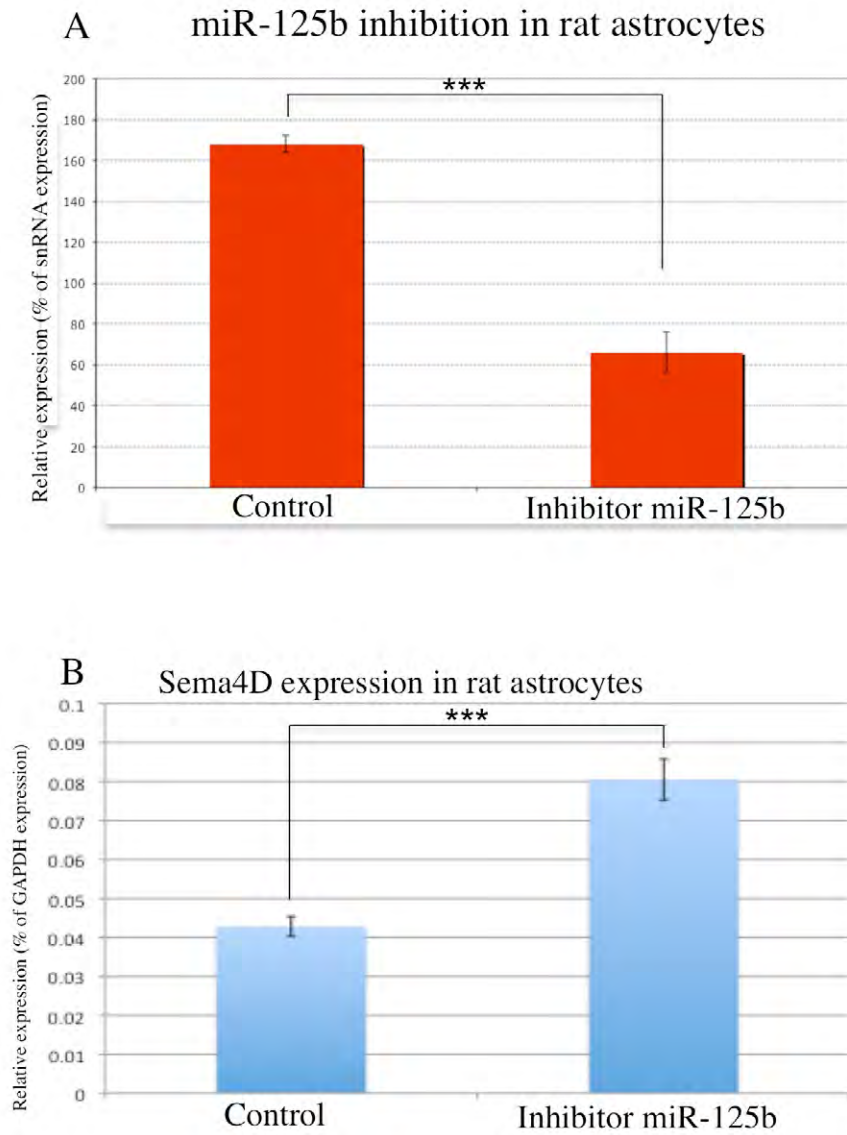

**Fig. S4.** (A) Quantitative RT-PCR of miR-125b in primary astrocytes after treatment with miR-125b inhibitor. (B) *Sema4D* levels increase in miR-125b inhibitor-treated astrocytes,  $P < 0.01$ .

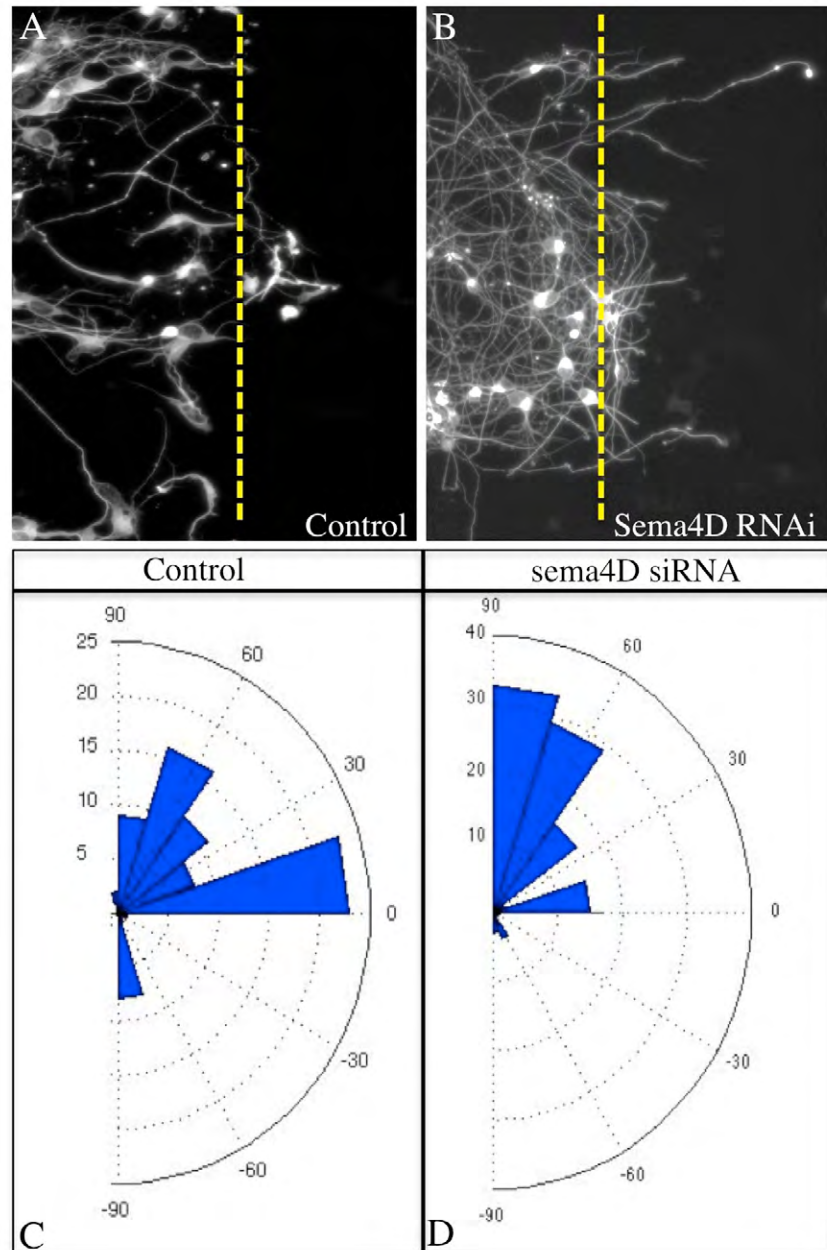

**Fig. S5.** Co-culture assay of primary rat astrocytes and neurons, neurons are stained with anti-β-III tubulin (A,B). In control samples after a scratch assay is performed neurons fail to regrow axons into the injury area (A). Levels of *Sema4D* are decreased in astrocytes using siRNA-mediated silencing, which creates a more permissive environment for neurons to extend axons into the injury site after a scratch assay (B). (C,D) Quantitation of the angle of projection of axons after injury in control versus *Sema4D* siRNA conditions. The angle distribution was plotted using the Rosetta histogram tool from Matlab, and the statistical significance of the data was analyzed using a one-way Anova ( $P < 0.001$ ).

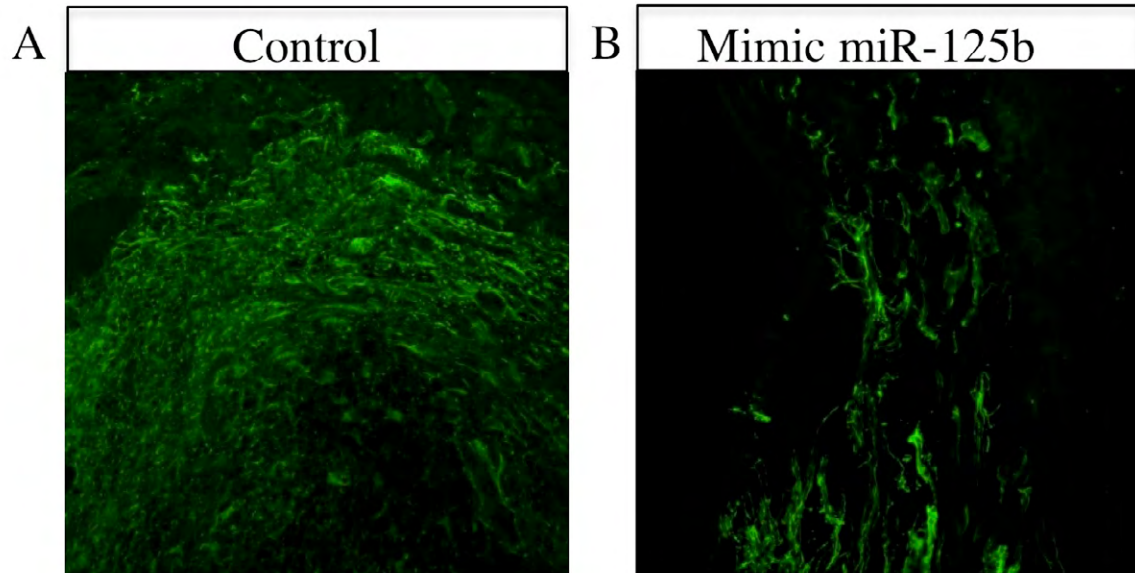

**Fig. S6.** (A,B) Levels of GFAP protein are significantly decreased in rats treated with a mimic of miR-125b (B) compared to the levels observed in control (A).

## Supplementary Table S1

### Down-regulated miR-125b target genes

| Gene                      | Location            | Family                            |
|---------------------------|---------------------|-----------------------------------|
| ADAMTS4                   | Extracellular Space | Peptidase                         |
| ATOH8                     | Unknown             | Other                             |
| AZI2                      | Cytoplasm           | Other                             |
| BRCC3                     | Nucleus             | Enzyme                            |
| DUSP7                     | Cytoplasm           | Phosphatase                       |
| EDC3 (includes EG:315708) | Cytoplasm           | Other                             |
| ESRRA                     | Nucleus             | Ligand-dependent nuclear receptor |
| HOXD9                     | Nucleus             | Transcription regulator           |
| LETM1                     | Cytoplasm           | Other                             |
| LRPAP1                    | Plasma Membrane     | Transmembrane receptor            |
| MGAT4A                    | Cytoplasm           | Enzyme                            |
| PPP2R1B                   | Unknown             | Phosphatase                       |
| PROS1                     | Extracellular Space | Other                             |
| RALGPS2                   | Unknown             | Other                             |
| RASGEF1A                  | Unknown             | Other                             |
| SBNO1                     | Unknown             | Enzyme                            |
| SESTD1                    | Extracellular Space | Other                             |
| SLC16A6                   | Plasma Membrane     | Transporter                       |
| SLC44A2                   | Extracellular Space | Transporter                       |
| SNX33                     | Cytoplasm           | Other                             |
| TBX4                      | Nucleus             | Transcription regulator           |
| TSPAN8                    | Plasma Membrane     | Other                             |
| USP46                     | Unknown             | Peptidase                         |

Table S1. Table of downregulated genes that contain seed sequences for miR-125b in their 3'UTR from the array on mim-ic-treated rats.
